**Title:** Novel Object Detection and Multiplexed Motion Representation in Retinal Bipolar Cells

**Authors:** John A. Gaynes<sup>1</sup>, Samuel A. Budoff<sup>1</sup>, Michael J. Grybko<sup>1</sup>, Joshua B. Hunt<sup>1</sup>, Alon Poleg-Polsky<sup>1\*</sup>

**Affiliations:** <sup>1</sup>Department of Physiology and Biophysics, University of Colorado School of  
5 Medicine, Aurora, CO 80045

\*Correspondence to: [alon.poleg-polsky@cuanschutz.edu](mailto:alon.poleg-polsky@cuanschutz.edu)

**Abstract:**

Antagonistic interactions between the center and surround receptive field (RF) components lie at the heart of the computations performed in the visual system. Center-surround RFs are thought to enhance responses to spatial contrasts (i.e., edges), but how they contribute to motion processing is unknown. Here, we addressed this question in retinal bipolar cells, the first visual neuron with classic center-surround interactions. We found that bipolar glutamate release emphasizes objects that emerge in the RF; their responses to continuous motion are smaller, slower, and cannot be predicted by signals elicited by stationary stimuli. The alteration in signal dynamics induced by novel objects dwarfs the enhancement of spatial edges and can be explained by priming of RF surround during continuous motion. These findings echo the salience of human visual perception and demonstrate an unappreciated capacity of the center-surround architecture to facilitate novel object detection and multiplexed encoding of distinct sensory modalities.

20

## Main text:

### Introduction

The ability to detect motion begins in the retina, which contains ganglion cells dedicated to the detection of local motion<sup>1-3</sup>, approaching objects<sup>4</sup>, acceleration<sup>5</sup> and the direction of movement (for a review, see<sup>6,7</sup>). The highly specialized computations in ganglion cells are driven and shaped by glutamate release from axonal terminals of bipolar cells (BCs), which in mice are divided into about 14-15 functional types that are tuned to different visual features<sup>8-10</sup>. The topographic stratification of BC axons in the inner plexiform layer (IPL) establishes some of the functional organization of visual processing in the retina: BCs that carry ON signals (depolarization to light) are found closer to the ganglion cell layer, and cells with sustained responses are segregated towards IPL borders<sup>8,11-13</sup>. The difference in visual processing between BCs reflects their center-surround architecture, comprised of two separate concentric regions sampling the visual signal. This RF structure is formed by direct innervation of BC dendrites by photoreceptors in their excitatory center and a combination of horizontal and amacrine cell inhibition in the antagonistic surround<sup>9,14-16</sup>.

Historically, motion signals in BCs have been understood as a linear combination of static responses, much like how the perception of motion is produced in movies by a rapid presentation of discrete images<sup>17,18</sup>. However, computations in cells with centre-surround RFs are inherently nonlinear<sup>19-22</sup> and depend on the spatiotemporal RF activation pattern, which differs between moving and static stimuli. Thus, despite the abundance of the classic centre-surround RFs in the early visual system, little is known about their impact on motion processing in general and on BC activity in particular.

To examine the properties of visual processing of moving objects in BCs, we recorded the change in glutamate levels across different depths of the inner plexiform layer (IPL) and captured the release dynamics of different BC types to moving or stationary bars. We reveal significant alteration in the peak and the temporal characteristics of the glutamate responses following object motion. Additionally, our results indicate that BCs can signal the appearance of novel objects that enter the visual scene. Flashed stationary objects or stimuli that emerge from

behind static occluders provoke intense discharge from all BCs, whereas continuous motion and  
50 disappearing stimuli suppress BC activation. These observations were not affected by the  
pharmacological blockage of amacrine cell inhibition. Accordingly, a detailed simulation of  
signaling in the outer retina replicates the diversity of motion responses in BCs and reveals how  
motion computations can be carried out at the first retinal synapse by a horizontal cell-derived  
inhibitory signal and influence the representation of a realistic visual input. Our results reveal a  
55 fundamental property of signal integration in center-surround RFs to identify newly appearing  
visual stimuli and diversify the representation of static and moving shapes.

## Results

### ***Glutamate responses in BCs to full-field motion are diverse and do not follow the response dynamics for stationary signals***

60 To study the representation of moving stimuli in BCs, we used two-photon microscopy  
to collect light-driven glutamatergic signals in whole-mount mouse retinas expressing iGluSnFR,  
responding to static flashes and full-field moving bars<sup>9,13,23</sup>. We systematically surveyed all  
layers of the inner plexiform layer (IPL) with multiple scan fields; pixels with similar responses  
were then grouped into regions of interest (ROIs, [Figs. 1a-b, s1, s2](#)). The spatial extent of most  
65 ROIs was smaller than 50  $\mu\text{m}$ , indicating sampling from a single cell or at most two functionally  
similar BCs ([Figs. 1b, s1](#))<sup>9,24</sup>. Responses to stationary flashes were used to combine ROIs from  
different experiments into functional clusters<sup>9,11,24</sup>. The optimal separation was obtained with 5  
OFF and 7 ON clusters ([Figs. 1c-d](#)); comparable to previous classifications of glutamate signals in  
the IPL<sup>9,11</sup>. Following clustering, we analyzed responses to moving bars. As expected, slower RF  
70 engagement prolonged motion response kinetics ([Fig. 1d-f](#)). Surprisingly, there was no  
correlation between the flash- and motion-driven rise time dynamics ([Fig. 1f](#), left, Pearson  
correlation coefficient,  $R=-0.04$ ).

It is possible that the difference in motion processing we describe reflects the  
topographic stratification of BC axons with sustained responses approximating the IPL  
75 borders<sup>8,11-13</sup>. To assess this, we analyzed signal parameters relative to recording depth ([Fig. 1g](#))  
or signal transiency index (TI, calculated from stationary response kinetics, [Fig. 1g-h](#)). We

identified a clear relationship between cluster transiency to the change in the amplitude ( $R = -0.95$ ) and the decay-time ( $R = 0.87$ ) of motion responses relative to the stationary signals (Fig. 1h). Similarly, the effect of motion on the peak amplitude and decay time was greatest in the central regions of the IPL, reflecting the stratification level of the transient BCs (Fig. 1g). In contrast, the change in the rise-time did not follow the transient-sustained division (Fig. 1h). Instead, we observed a gradual decrease in the motion/stationary ratio for the rise-time kinetics with increasing depth in the retina (Fig. 1g). Overall, the observed low correlation in key aspects of response shape and the distinct pattern of signal dependency on IPL depth between static and moving objects indicate a multiplexed representation of motion and stationary information in the BC population.

Notably, these observations are not an artifact of our clustering approach, as our algorithm was agnostic to motion information. We conducted several tests to rule out the possibility that the results we describe here are due to the grouping of pixels with different recruitment times during motion responses. First, at odds with the predicted effects of such pixel averaging, the degree to which motion impacted signal dynamics varied systematically between clusters, and the inter-cluster variability of responses was higher during motion (Fig. 1d). Second, the mean responses recorded for each group closely mirrored the signals recorded in individual pixels (Fig. s2). Last, neighboring regions of the retina respond sequentially to motion, and for this reason, the influence of pixel averaging should be most evident in groups with wide spatial pixel distribution. In contrast to this prediction, however, we found that the spread of each group's pixels along the axis of motion was not correlated with the response dynamics (Fig. s3).

### ***Enhanced representation of novel stimuli***

Previous work demonstrated that neurons could employ a simple strategy of comparing the spatial extent of center-surround recruitment to detect local spatial contrasts<sup>19,25,26</sup> and diversify the representation of flashed objects<sup>9,21</sup>. According to the classic description of the center-surround interactions, occluders masking part of the surround enhance RF output (Fig. 2a 'Edge'). We reasoned that responses to moving stimuli should also be sensitive to stationary

105 edges in the RF. To explore this possibility, we presented horizontally moving bars and masked the stimulus on the left or the right halves of the display.

Unexpectedly, the kinetics and the amplitude of the glutamate release were significantly faster/higher for bars emerging from the mask than for motion in the opposite direction (Fig. 2 'Emergence' vs. 'Exit'). Across all ROIs, the peak response amplitude following emerging motion  
110 was significantly higher than the signal observed during full-field motion ( $122 \pm 2\%$  mean  $\pm$  SEM;  $p < 0.001$  vs. full-field motion, ANOVA followed by Tukey test), and the rise-time was sharpened by more than 50% (Fig. 2d). In comparison, the mean ( $\pm$ SEM) ratio between responses to full-field flashes and motion in the same ROIs was  $136 \pm 2.4\%$  ( $p < 0.001$ , ANOVA followed by Tukey test,  $n = 365$ , Fig. 2). Thus, in terms of shape peak and temporal dynamics, the representation of  
115 emerging motion more closely resembles static flashes than continuous motion (Fig. 2).

We next separated between and compared transient ( $n = 182$ ) and sustained ( $n = 183$ ) ROIs to assess the effect of signal kinetics on visual processing in the presence of edges. The peak glutamate signal recorded for static flashes and emerging objects was significantly higher in ROIs with transient signals (Figs. 2c, s4), in line with the abovementioned differences in  
120 motion signaling between the transient and sustained populations (Fig. 1g-h). In contrast, the dynamics of motion exit were indistinguishable from continuous motion (Figs. 2, s4).

Compared to the classic role of center-surround in detecting spatial boundaries, we note that even though the occluding mask (when present) was identical for all protocols, we did not observe a significant effect of the masks on stationary responses (Figs. 2, s4  $p > 0.3$  for  
125 peak/kinetics, ANOVA). We interpret this finding to indicate that RF structure in the early visual system is tuned to highlight new information and not to detect inhomogeneous spatial compositions.

### ***Amacrine cell inhibition is not required for novel object sensitivity and slower motion kinetics***

What are the cellular components underlying motion computations in BCs? Previous  
130 work suggested that amacrine cell inhibition diversifies the representation of stationary stimuli that partially occupy the RF of BCs<sup>9</sup>. Correspondingly, a cocktail of  $50 \mu\text{M}$  SR95531,  $100 \mu\text{M}$

TPMPA, and 1 $\mu$ M Strychnine to block GABA<sub>A</sub>, GABA<sub>C</sub> and glycine receptors (Fig. 3a)<sup>9,24</sup> changed the shape of glutamate waveforms elicited by stationary flashes (Figs. 3) and of calcium transients in ganglion cells (Fig. s5). Yet, motion signals in the IPL were not affected by the  
135 inhibitory blockers (Fig. 3). Because horizontal cells can control photoreceptor output by mechanisms that do not require the release of neurotransmitters<sup>16,27,28</sup>, we reasoned that our pharmacological manipulation did not fully disrupt the horizontal feedback on the photoreceptors, suggesting that motion processing is performed already in the first retinal synapse.

#### 140 ***A common horizontal cell-mediated surround can drive diverse motion responses***

To test whether signal interactions in the outer retina are sufficient to explain our experimental findings, we constructed a computational model of visual processing in the outer retina and BCs (Fig. 4). We activated the model with stationary and moving bars and recorded the resulting signals in photoreceptors, horizontal cells, and BCs. The simulation revealed a  
145 possibility for a pronounced representation of emerging motion already in photoreceptors (Figs. 4), but only when horizontal cell inhibition was intact (Fig. s6). The mechanistic implementation of this outcome relied on the lag between activation times of photoreceptors and horizontal cells. At the location of object emergence, horizontal cell engagement coincided with photoreceptor activation (Figs. 4b, d, s7). Elsewhere, the initiation of horizontal cell signal  
150 preceded direct light-induced photoreceptor activation by as much as ~100 ms and correlated with diminished photoreceptor output (Fig. 4b, d, s7). While our model incorporated nonlinear interactions between cells and synaptic inputs, a similar temporal relationship in RF activation was readily observed in a linear center-surround architecture (Fig. s8). In both models, established (continuous) motion recruits the RF consecutively because moving objects  
155 encounter the surround first. RF components were engaged more synchronously by emerging stimuli and activated simultaneously by stationary flashes (Figs. 4). In general, the encoding of existing objects is accompanied by a longer temporal delay between the initial activation of the surround and subsequent center stimulation. Due to this delay, surround inhibition is more

developed by the time the center is engaged by the stimulus and is, therefore, more likely to  
160 suppress responses to continuous motion.

Focusing on the factors that influence BC response dynamics, we note that transient kinetics were mediated by faster neurotransmission, but also, unexpectedly, by elevated sensitivities to photoreceptor release (Figs. s8, s7). The higher threshold required for effectual activation increased the sensitivity of transient BCs to small fluctuations around the peak  
165 photoreceptor activity. In agreement with recent findings<sup>22</sup>, our model suggests that transient BCs receive a more rectified, nonlinear copy of the photoreceptor signal and predicts that such nonlinearity creates a substrate for more distinct responses to motion vs. stationary stimuli and promotes the enhancement of novel object emergence (Figs. 4c-d, s9).

### ***Enhanced representation of novel stimuli under natural movies requires center-surround 170 organization***

Next, we asked whether the fundamental properties of the center-surround RF architecture are sufficient to identify novel objects under realistic visual conditions. To address this question, we simulated responses from a population of linear center-surround neurons (Fig. s9) to movies showing the appearance of predators in a natural mouse habitat (Fig. 5a).  
175 Although the simulated cells lacked nonlinear signal processing mechanisms, we found these cells capable of generating a rich representation of dynamically changing scenes. Cells responding to established motion encoded the local contrast differences between the stimulus and the background (Figs. 5b-c). Comparable to our findings presented above, stimulus emergence correlated with robust responses (Fig. 5b-c, s10). Interestingly, novel motion enhancement was  
180 evident mainly at the initial site of stimulus appearance (the wing in the example shown in Fig. 5), implying a spatial focus for novel object detection spanning about 100  $\mu\text{m}$  of retinal space.

Using the simulation, we were able to test the contribution of the surround to this computation. We reformulated the RF description for the tested population to exclude the surround. We found that the outputs of the cells in this simulation were still tuned to the local  
185 contrast (Fig. 5d-e). However, the response amplitudes were similar for continuously moving

and emerging stimuli, indicating that similar to our findings in the simulated retinal circuit, novel object detection required surround participation (Fig. 5e, s10).

What is the benefit of utilizing the center-surround architecture to compute novel object appearance in a realistic environment? Stronger activation near the mask-stimulus boundary can be beneficial for detecting stimuli in downstream neurons. To quantify the information that is encoded by individual neurons in our simulation, we measured the mutual information from responses of cells at the location of stimulus emergence. Analysis of signal entropies calculated from the peak responses to continuous and novel motion revealed that each cell is capable of transmitting  $0.62 \pm 0.12$  bits in each trial (Fig. 5f). Comparable information levels were found for responses in cells near vs. far ( $>200 \mu\text{m}$ ) from the stimulus emergence region within the same simulation trial (data not shown). A similar analysis in center-only neurons failed to find evidence of information transfer about novel object appearance (mutual information =  $0.08 \pm 0.17$  bits/cell,  $p > 0.6$  vs. 0, Fig. 5f), suggesting that in this scenario, postsynaptic circuits have to employ different processing schemes to detect the presence of new objects.

### ***Edge effects influence the analysis of motion processing in the retina***

Given the participation of BCs in novel motion detection, we asked whether the dependence of BC signals on the direction of motion near mask-stimulus boundaries impacts the computation of direction selectivity (DS). The earliest direction-selective signals are present in dendrites of starburst amacrine cells (SACs), which are tuned to detect stimulus motion towards dendritic tips (Fig. 6a)<sup>29-33</sup>. Despite intense effort, explaining the biological implementation of this computation remains elusive<sup>17,30,34-39</sup>. A common strategy to probe SAC DS is to isolate dendritic computations<sup>6,40</sup> with visual protocols structured to stimulate a part of the SAC<sup>30,36,39,41</sup> - effectively masking part of the stimulus (Fig. 6b). To explore whether the glutamatergic drive to SACs is affected by the mask-stimulus boundary, we expressed iGluSnFR driven by the ChAT promoter (Fig. 6a)<sup>34,35</sup>. We presented visual stimuli as above (Fig. 6b) and set the size of the field of view to match the span of BC innervation of a single SAC dendrite (Fig. 6b,  $\sim 80 \mu\text{m}$ )<sup>30,39</sup>.



Akin to our other findings, glutamate responses were more pronounced for emerging  
215 stimuli (Fig. 6c-d). The mean ( $\pm$ SD) direction selectivity index (DSI) computed from moving bar  
responses with the direction of motion towards/away from the boundary at the center of the  
display was  $32 \pm 21\%$  ( $p < 0.001$  vs. 0, t-test,  $n = 81$  ROIs, Fig. 6e), while full-field moving stimuli  
evoked comparable glutamatergic responses in all directions (Fig. 6d-e). Could the directional  
effect observed in the presence of a mask-stimulus boundary contribute to DS computations in  
220 SACs? A simple analysis shows that the answer is no. The enhancement of BC drive aligns with  
the preferred dendritic axis in SACs whose cell bodies happen to lie near the mask (Fig. 6b, e  
'Edge near soma'). However, signals to SACs in less optimal configurations are in the 'wrong'  
direction. The grey-colored SAC illustrated in Fig. 6b serves as an example of a cell whose soma  
is located deeper in the stimulated region yet proximal enough to extend its dendrites over the  
225 mask ('Edge near tips'). With the direction of motion away from the mask-stimulus boundary  
and towards the soma of this cell, stronger responses to emerging motion lead to a reversed  
directional tuning (Fig. 6e 'Edge near tips'), in contrast to what is expected of a proper  
directional mechanism.

## Discussion

230 Using the retinal BCs as a model system, we were able to investigate the properties of  
motion processing in center-surround RFs. We found that the representation of continuous  
motion was associated with reduced peak amplitudes and prolonged temporal dynamics of  
glutamate signals compared with sudden object appearance in most BC types. Motion  
responses could not be reliably predicted from the dynamics of responses to stationary flashes,  
235 indicating a multiplexed representation of static and moving objects (Fig. 1). Visual processing  
in the retina is thought to be facilitated by parsing the sensory input into parallel information  
channels at the level of the BCs<sup>8</sup>. According to the literature, these communication channels  
represent different transformations of the photoreceptor signals and emerge from the  
underlying neuronal infrastructure. For example, luminance and chromatic selectivity arise  
240 from specific targeting of bipolar dendrites to distinct photoreceptors, and response polarity  
depends on the composition of glutamate receptors. Here, breaking with the established rules,  
we reveal an additional layer of complexity present in the retina. We demonstrate that

individual BC types convey different temporal features of the stimulus contingent on the presence of motion. This multi-layered decomposition of the visual scene could potentially  
245 reduce the number of cells required for effective visual processing and complicates the analysis of motion responses from stationary stimuli, as is discussed in more detail below.

The unexpected diversity of motion responses revealed by our experiments highlights an asymmetric interaction between moving stimuli and static occluders; the encoding of object disappearance was similar to continuous motion, whereas newly emerging stimuli exhibited  
250 faster and more pronounced signals that qualitatively resembled the response to static flashes - particularly in transient BCs (Fig. 2).

Conceptually, our findings reflect a previously unappreciated capacity of center-surround RFs to signal the appearance of new objects. This property is a logical but previously undescribed consequence of the classic center-surround RF formulation. The mechanistic  
255 explanation for this function is straightforward and relies on the sequence of RF activation by the stimulus. Continuously moving stimuli always enter the surround RF region first, priming the surround towards a more effective inhibition by the time the center is engaged. This process doesn't require any specific neuronal infrastructure and is present even in a linear RF formulation (Figs. 4, 5). Priming of the surround is weaker or absent in emerging motion and  
260 suddenly appearing objects. Correspondingly, the responses to these stimuli reflect the stronger role of the center component in RF integration, leading to empirically observed enhanced response amplitudes and distinct temporal dynamics between the novel and existing objects.

In our hands, the computation of novel object detection was highly prominent across all  
265 BCs, whereas their spatial contrast sensitivity, as measured by the ratio between the responses to static edges vs. full-field illumination, was not statistically significant (Fig. 2). These results suggest that in contrast to the prevailing view, sensitivity to spatial contrasts serves a secondary functional role in center-surround RFs, at least in the cells and the visual conditions we probed.

Our experiments and detailed circuit models show that photoreceptors and horizontal  
270 cells are the only circuit elements required to generate motion responses in BCs (Figs. 3, 4),

leading to the conclusion that the major steps in the computation of object motion already occur at the first synapse in the retina. Our findings support the idea that signal transformation from the photoreceptors to BCs could be nonlinear and that the degree of nonlinearity is larger for transient BCs<sup>22</sup>. Why is processing linearity correlated with the shape of the response? Our  
275 model of signal integration in the outer plexiform layer suggests a possible answer. Nonlinear signal transformation at the photoreceptor-BC synapse could impose a threshold on the amplitude of the photoreceptor output that is required for effective activation of the postsynaptic cell (Fig. s7). As photoreceptors typically respond to light onset and light offset with a rapid membrane potential fluctuation<sup>42,43</sup>, nonlinear BCs are more likely to be  
280 disproportionately sensitive to these phases of photoreceptor release; their fast temporal dynamics reflect the transient shape of the filtered photoreceptor output they sample. Meanwhile, a linear signal processing mirrors the original shape of the photoreceptor light response (Figs. 4, s7). The exact biological implementation of the nonlinear photoreceptor-BC synapse dynamics is currently unclear but could plausibly be mediated by a differential affinity  
285 of BC dendrites to photoreceptor release<sup>44</sup>. In the end, the nonlinear nature of the transient BC population is known to contribute to a rudimentary feature detector-like behavior that is tuned to certain visual conditions, such as signal polarity and spatial inhomogeneity<sup>22</sup>. We can now add novel object appearance to this list.

We used stimuli that were explicitly designed to compare responses to moving and  
290 static objects and representation of novel vs. existing visual items. Previous reports demonstrated that the retina is capable of detecting acceleration<sup>5</sup>, differential motion<sup>45</sup>, looming (approaching) motion<sup>4</sup>, and distinguish between a motion to uncorrelated spatiotemporal activation<sup>3</sup>. These visual functions are thought to require higher-order retinal neurons (e.i., amacrine and ganglion cells). How RF components are integrated during the  
295 presentation of these stimuli and whether RF computations contribute to such sophisticated calculations remain to be elucidated.

In the last decade, several groups found evidence for a spatial offset between presynaptic BC populations that are aligned with the directional axis in DS ganglion cells and dendritic position in SACs<sup>17,24,30,46</sup>. This circuit organization can support directional tuning by a

300 mechanism first described by Hassenstein and Reichardt<sup>47</sup> - if the response speed of the BCs follows their spatial arrangement. Conflicting results were reached in studies designed to test the predictions of this model using electrophysiological and imaging approaches<sup>18,39,48</sup>. Importantly, all previous work examined BC output in response to the presentation of stationary inputs, which, as our results indicate, do not accurately reflect the dynamics in BCs  
305 during motion. Proposed directional computations are particularly dependent on BCs rise times, which, as our data reveal, are uncorrelated between moving and static objects (**Fig. 1**). At the very least, the dramatic increase in the rise-times dynamics we observed in our recordings suggests a shift in speed dependence of the Hassenstein-Reichardt detector to slow-moving objects. Further experiments will be required to resolve this issue and elucidate the  
310 potential impact of visual edges on observed DS (**Fig. 6**).

Our findings of motion processing in the early processing stages in the retina have intriguing psychophysical implications to the perception of novel stimuli over continuing motion and echo the salience of visual perception in humans<sup>49,50</sup>: the sudden appearance of new objects grabs attention reflexively; motion onset is less salient - but more noticeable than  
315 continuous motion. Our data propose that these computations are hard-wired in the retina and reflect the information content conveyed by the respective visual items. From an ecological perspective, the utility of continuous retinal motion is diminished as it may be self-generated by locomotion through the environment and because the trajectory of continuously moving objects could be predicted by past sensory input. Conversely, novel stimuli can alert to a  
320 predator or prey; their fast processing is vital to survival. All the necessary machinery for motion processing in BCs we describe in the mouse are conserved in primates, providing strong evidence that enhanced representation of newly flashed and emerging moving objects are consequences of a bottom-up process fundamental to how visual stimuli are computed in the retina.

325 Taken together, our work complements previous studies revealing decorrelation of signals by surround inhibition<sup>9,21,51</sup> and shows how simple operational concepts give rise to complex visual computations. Diverse representation of different features of the visual space in

a single neuronal population and early detection of salient environmental cues are powerful strategies that reduce the computational burden of the visual system. The surprising finding  
330 that the classic center-surround RF architecture is sufficiently versatile to take part in seemingly unrelated tasks is critical to the understanding of visual computations in multiple brain regions and the design of future studies of visual perception.

## Methods

### 335 *Virus expression*

All animal procedures were conducted in accordance with U.S. National Institutes of Health guidelines, as approved by the University of Colorado Institutional Animal Care and Use Committee (IACUC). For intravitreal virus injections, mice of ages p21–120 of either sex were anaesthetized with isoflurane; ophthalmic proparacaine and phenylephrine were applied for  
340 pupil dilation and analgesia. A small incision at the border between the sclera and the cornea was made with a 30 gauge needle. 1  $\mu$ L of AAV solution was injected with a blunt tip (30 gauge) modified Hamilton syringe

([http://retina.anatomy.upenn.edu/~bart/B\\_Sci/InjectorSyringepayments.html](http://retina.anatomy.upenn.edu/~bart/B_Sci/InjectorSyringepayments.html)).

AAV9.hsyn.iGluSnFR.WPRE.SV40, (a gift from Loren Looger, Addgene plasmid # 98929 ;  
345 <http://n2t.net/addgene:98929> ; RRID:Addgene\_98929;  $10^{13}$  vg/mL in water) was injected into the vitreous humour of wild type mice (C57BL/6J, Jackson laboratory, [www.jax.org](http://www.jax.org)). To express iGluSnFR in SACs only, AAV9.hsyn.FLEX.iGluSnFR.WPRE.SV40 (a gift from Loren Looger, Addgene plasmid # 98931; <http://n2t.net/addgene:98931>; RRID:Addgene\_98931, similar concentration) was used in Chat-Cre transgenic mice. AAV9-pGP-AAV-syn-jGCaMP7f-WPRE  
350 (Addgene plasmid # 104488; <http://n2t.net/addgene:104488>; RRID:Addgene\_104488) was used to measure intracellular calcium levels. Experiments on retinas from all animal groups were performed 2-6 weeks following virus injection.

### *Imaging procedures*

Mice were not dark-adapted to reduce rod-pathway activation. Two hours after  
355 enucleation, retina sections were whole mounted on a platinum harp with their photoreceptors facing down, suspended ~1 mm above the glass bottom of the recording chamber. The retina was kept ~32°C and continuously superfused with Ames media (Sigma-Aldrich, [www.sigmaaldrich.com](http://www.sigmaaldrich.com)) equilibrated with 95%O<sub>2</sub>/5%CO<sub>2</sub>.

### *Light-stimulation*

360 Light stimuli were generated in Igor Pro 8 (Wavemetrics, [www.wavemetrics.com](http://www.wavemetrics.com)) PC  
and displayed with a 415 nm LED collimated and masked by an LCD display (3.5 Inch, 480x320  
pixels, refresh rate of 50 Hz) controlled by a custom-written python script running on raspberry  
pi 3 computer. Display luminosity was gamma corrected with a powermeter (Thorlabs,  
[www.thorlabs.com](http://www.thorlabs.com)); the stimulus was set to either 60% or -60% Michelson contrast. Frame  
365 timing was controlled by a clock signal from Sutter IPA patch-clamp amplifier (Sutter  
Instruments, [www.sutter.com](http://www.sutter.com)) driven by Igor Pro and read from one of the digital I/O ports of  
the raspberry pi. Light from the visual stimulus was focused by the condenser to illuminate the  
tissue at the focal plane of the photoreceptors (resolution = 2.5  $\mu\text{m}/\text{pixel}$ , background light  
intensity = 30,000-60,000  $\text{R}^* \text{rod}^{-1}$ ). Both vertical and horizontal light stimulus positions were  
370 checked and centered daily before the start of the experiments. The following light stimulus  
patterns were used: static bar covering the entire display (800x800  $\mu\text{m}$ ) presented for 2  
seconds. A 1 mm-long bar moving either to the left or the right directions (speed = 0.5 mm/s;  
dwell time over each pixel = 2 s). These stimuli were repeated with masks (at background light  
levels), spanning the full height of the display, occluding different portions of the stimulus. Each  
375 visual stimulation protocol was repeated at least 3 times.

### ***Imaging***

Glutamate and calcium imaging was performed with Throlabs Bergamo galvo-galvo two-  
photon microscope. A pulsed laser light (920 nm,  $\sim 1 \mu\text{W}$  output at the objective; Chameleon  
Ultra II, Coherent, [www.coherent.com](http://www.coherent.com)) was used for two-photon excitation projected from an  
380 Olympus 20X (1 NA) objective. A descanned (confocal) photomultiplier tube (PMT) was used to  
acquire fluorescence between 500 and 550 nm. The confocal pinhole (diameter = 1 mm) largely  
prevented stimulus light (focused on a different focal plane), from reaching the PMT, allowing  
us to present the visual stimulus during two-photon imaging. A photodiode mounted under the  
condenser sampled transmitted laser light to generate a reference image of the tissue.  
385 Fluorescence signals were collected in a rapid bidirectional frame scan mode (128x64 pixels;  
 $\sim 50$  Hz, Thorimage). The line spacing on the vertical axis was doubled to produce a rectangular  
imaging window (typically  $\sim 82 \times 82 \mu\text{m}$  size, in some experiments, the window was set to  
 $\sim 164 \times 164 \mu\text{m}$ ; the corresponding pixel sizes were 0.64  $\mu\text{m}$  or 1.28  $\mu\text{m}$ ). To reduce shot noise,

images were subsampled by averaging 2x2 neighboring pixels and filtered by a 20 Hz low pass  
390 filter offline. Horizontal and vertical image drifts were corrected online using a reference z-stack  
acquired before time-series recordings.

For pharmacological manipulations, we used SR95531 (50  $\mu$ M, Abcam, [www.abcam.com](http://www.abcam.com)) to block GABA<sub>A</sub> receptors, TPMPA (50  $\mu$ M, Tocris, [www.tocris.com](http://www.tocris.com)) to block  
GABAC receptors and strychnine (1  $\mu$ M, Abcam) to block glycine receptors. All drugs were  
395 mixed with the bath Ames medium.

### ***Analysis***

All analysis was done in Igor Pro 8. Fluorescence signals were averaged across repeated  
visual protocol presentations. Pixels with  $dF/F$  values  $>20\%$  were selected for clustering  
analysis. For the initial clustering of ROIs with similar response kinetics, we combined 1-second  
400 recordings of the response shapes around the time of stimulus entrance to the imaging window  
from each of the tested visual protocols across all imaged planes. A similarity matrix was  
constructed from a pairwise pixel comparison measured with Igor build-in farthest-point  
clustering algorithm. McClain-Rao index was used to determine the optimal number of clusters  
32. The shapes of the resulting ROIs were fitted with a sigmoid for the rising phase of the  
405 response and with a single exponential for the decay phase. ROIs were manually curated and  
removed from analysis if pixel variability, measured with a coefficient of variation, exceeded 1.

We computed the horizontal RF position from responses to motion over the entire  
display. We first determined the timing of 50% rise-time from trials with leftward and rightward  
motion. ROIs with their RF center in the middle of the display should respond to both stimuli at  
410 the same time following stimulus presentation. In an ROI where the center of the RF is located  
to the left/right of the display center, a rightward moving stimulus elicits a response that comes  
earlier/later compared to a trial with a leftward moving stimulus. RF position was computed as  
half the time difference between the diametrically opposed trials, multiplied by stimulus speed.  
Trial responses were considered to be to full-field stimulation if the RF center was at least 100  
415  $\mu$ m away from the nearest visual edge formed either by masks or the boundaries of the display.



Similarly, responses were considered to be near an edge if at least one of the visual edges was closer than 50  $\mu\text{m}$  to the RF center.

To detect similarly shaped groups between different experiments, we conducted a secondary hierarchical clustering. Our initial clustering incorporated responses from trials with moving stimuli and responses near visual edges. Motion responses shift in time as the stimulus progresses over the retina, making comparisons between ROIs difficult. Edge effects may also affect the shape of the responses. For these reasons, as an input to the similarity matrix, we performed a pairwise comparison between 1-second long responses to full-field static stimulation only, for positive contrast stimuli presentation for ON groups and negative stimuli for the OFF groups. As before, the optimal cluster number was determined with the McClain-Rao index analysis.

Transiency index (TI) was calculated as the ratio between the peak and the mean of the response within the stimulation window. TI=1 indicates a sharp and transient response, TI close to zero is produced by sustained plateaus.

Direction Selectivity Index (DSI) was calculated as a vector sum of vectors  $V_i$  pointing in the direction of the stimulus and having the length  $R_i = \text{peak } dF/F$  of the response to that stimulus.

$$DSI = \frac{\sum_{i=1}^n V_i}{\sum_{i=1}^n R_i}$$

Where n is the number of probed directions. DSI can range from 0 to 1, with zero indicating no directional preference and 1 indicating responses to only one direction of stimulation.

Bonferroni correction was used for multiple comparisons. Whenever ratios between parameters were compared, statistics were computed on a logarithmic transformation of the data.

### **Modeling**

All simulations were conducted in Igor Pro 8.

### **Linear receptive field model**

We simulated a simple spatiotemporal RF structure to examine the engagement of a cell with a center-surround RF organization by visual motion. The spatial extent of the center and surround RF components were defined by a two-dimensional Gaussian function with half widths of 50 and 200  $\mu\text{m}$ , respectively. The responses for the RF components were modeled as a single exponential with a time constant ( $\tau$ ) of 20 ms for the center and 100 ms for the surround. The simulation ran for 4500 ms with a time step of 1 ms. In each step, the total illuminated RF area was computed from the convolution of the center/surround RF components with the stimulus. RF activation at time step  $t$  was changed by the difference between the sum of the newly illuminated RF area and the signal from the previous time step:

$$RF_t = (RF_{illumination,t} - RF_{t-1})/\tau + RF_{t-1}$$

The full RF was computed according to the following equation:

$$RF_{Full} = RF_{center} - RFactor_{Surround} \times F_{Surround}$$

Where  $Factor_{Surround}$  indicated the intensity of the surround activation and varied between 0 (no surround) to 0.5.

Simulated neurons were distributed on a 1000 x 1000  $\mu\text{m}$  square grid stimulated either by moving / stationary bars with similar parameters (speed, contrast, size) as in the experiments or by natural images.

### **Natural movies**

The natural movies were composed of background/mask chosen from individual frames of the 'catcam' database<sup>22,52</sup> and stimuli depicting birds of prey. The images were cropped to 100 x 100 pixels and presented as an input to the simulated network. The intensity of the background/mask was scaled to be at the mean pixel level (i.e., 128 pixel luminance value) with an SD of 30. The mean intensity of the stimuli was set to be 2 SD higher than the background mean. In some simulations, the stimulus was not presented. Instead, the background translated horizontally at 0.5 mm/s as measured over the artificial retina. The shape of the mask was

chosen by foreground objects in separate movie frames. The mask was absent for simulations of continuous motion. Response amplitudes were measured in a time window spanning 500 ms starting at the time of object appearance over the location of the simulated cell. Mutual  
470 information was measured as the entropy of responses near (<100  $\mu\text{m}$ ) the initial appearance of the stimulus near the mask/stimulus boundary in the presence/absence of the mask, minus the average entropy of responses to the individual conditions.

### **Detailed retinal simulation**

The simulated retina consisted of a one-dimensional array (length=700  $\mu\text{m}$ ) of  
475 photoreceptors, horizontal cells, and BCs, spaced 10  $\mu\text{m}$  apart. Stimuli were provided by a bright bar that was either flashed for 2 seconds or moved over the retina (speed=0.5 mm/s). Visual edges were created by masking visual presentation near the borders of the array. The simulation time step was 1 ms.

Photoreceptor activation was modeled as a difference between two activation functions  
480 ( $Ph_A$ ,  $Ph_B$ ) with instantaneous rise time and decay times of 60 and 400 ms, respectively.

$$Ph = Ph_A - 0.8Ph_B$$

Time step computations for the activation functions were given by:

$$Ph_{A,t} = (RF_t - Ph_{A,(t-1)})/60 + Ph_{A,(t-1)}$$

$$Ph_{B,t} = (RF_t - Ph_{B,(t-1)})/400 + Ph_{B,(t-1)}$$

485 Where RF was computed from the value of the stimulus at the position of the photoreceptor and horizontal cell feedback (see below) and  $Ph_{t-1}$  represents the value of the activation function on a previous time step.

Horizontal cells integrated all photoreceptor signals in their RF. The spatial RF signal in horizontal cell<sub>*i*</sub> ( $HC_{\infty,i}$ ) was described by a projection of a two-dimensional Gaussian function  
490 with a radius of 60  $\mu\text{m}$  on the single spatial dimension of the photoreceptor array according to the following:

$$HC_{\infty,i} = Gain_{Ph \rightarrow HC} \sum_{j=1}^n d_{i,j} Ph_j / \sum_{j=1}^n d_{i,j}$$

Where the Photoreceptor- horizontal cell gain was set to 1 unless specified otherwise;  $n=150$  is the number of photoreceptors,  $d_{i,j} Ph_j$  represents the dimensionality corrected signal from photoreceptor  $j$  on horizontal cell  $i$  and the last term used to correct responses by RF size.

The total activation of the horizontal cells at a time step  $t$  was given by the following equation:

$$HC_{i,t} = \frac{HC_{\infty,i} - HC_{i,(t-1)}}{\tau_{HC}} + HC_{i,(t-1)}$$

In which  $\tau_{HC}$  is the horizontal cell activation time constant = 120 ms.

Each photoreceptor combined horizontal cell signals (normalized by the same distance function) with visual illumination as follows:

$$RF_{i,t} = Gain_{HC \rightarrow Ph} \left( \sum_{j=1}^n d_{i,j} HC_{j,t} + VS_{i,t} \right) / \left( \sum_{j=1}^n d_{i,j} HC_{j,t} + VS_{i,t} + 1 \right)$$

Where the photoreceptor- horizontal cell gain was set to 1,  $VS_{i,t}$  represents the value of the visual stimulus over photoreceptor  $i$  at time  $t$  and  $HC_{j,t}$  is the feedback from horizontal cell  $j$ .

Similar to horizontal cells, BCs sampled photoreceptor input by dimensionality-corrected RF (size=50  $\mu\text{m}$  unless specified otherwise). The steady-state input-output transformation at the photoreceptor-BC synapse was given by the following relationship:

$$BC_{\infty,i} = \sum_{j=1}^n d_{i,j} \left[ \frac{1}{1 + e^{V_{slope}(V_{1/2} - Ph_j)}} - \frac{1}{1 + e^{V_{slope} V_{1/2}}} \right]$$

Where  $d_{i,j}$  was the distance function computed as for horizontal cells,  $V_{slope}$  and  $V_{1/2}$  defined the slope and the 50% point of the Ph-BC transformation function, and the last term provided a subtraction of the baseline photoreceptive signal.

Last, the actual voltage at each BC  $i$  at time step  $t$  was computed using the following:

$$BC_t = (BC_{\infty,t} - BC_{t-1}) / \tau_{BC} + BC_{t-1}$$

In which  $\tau_{BC}$  indicate the activation time constant = 60 ms (unless specified otherwise).

**Funding:** This work was supported by NIH grant (R01 EY030841-02) to Alon Poleg-Polsky.

515 **Author contributions: John Gaynes:** Investigation, Writing-Review &Editing, Supervision

**Samuel Budoff:** Investigation, Formal analysis, Writing-Review &Editing **Michael Grybko:**

Investigation, Writing-Review &Editing **Joshua Hunt:** Formal analysis, Writing-Review &Editing

**Alon Poleg-Polsky:** Conceptualization, Methodology, Software, Formal analysis, Resources,

Data Curation, Writing-Original draft, Supervision, Project administration, and Funding

520 acquisition

**Competing interests:** Authors declare no competing interests

**Data and materials availability:** The code for the visual stimulation and simulations is available

on (<https://github.com/PolegPolskyLab/>). The full dataset has not been uploaded in a public

repository due to file size limitation but is available upon request from [alon.poleg-](mailto:alon.poleg-)

525 [polsky@cuanschutz.edu](mailto:polsky@cuanschutz.edu)).

## Figures

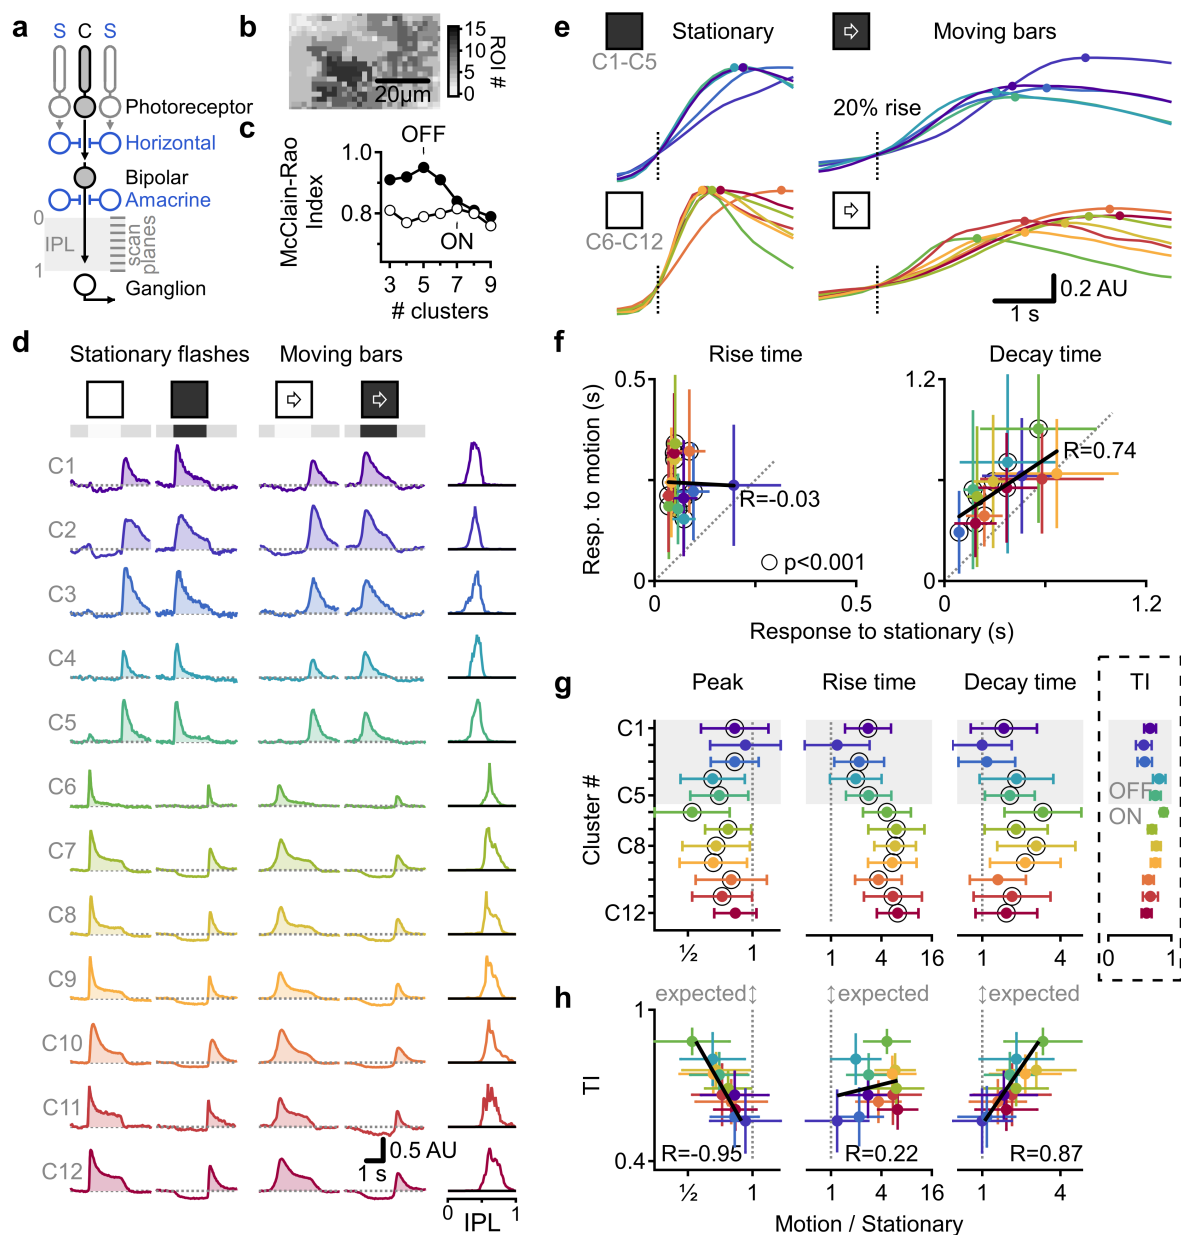

**Fig. 1. Multiplexed representation of static and moving objects in BCs.** **a** Centre-surround RF structure in BCs. **b** Exemplar ROIs identified from iGluSnFR fluorescence in a single scan plane. **c** Diversity of responses to stationary flashes from 1265 ROIs suggests 12 functional clusters of glutamate release. **d** Responses from the identified clusters, sorted by pixel depth distribution (right). **e** Focus on the rising phase of the signals. Circles indicate peaks. **f** Mean ( $\pm$ SD) clusters' kinetics, linear fits in black. **g-h** IPL depth (**g**) or transiency index (**h**, inset in **g**) vs. the mean ( $\pm$ SD) responses ratio.

530

535

22

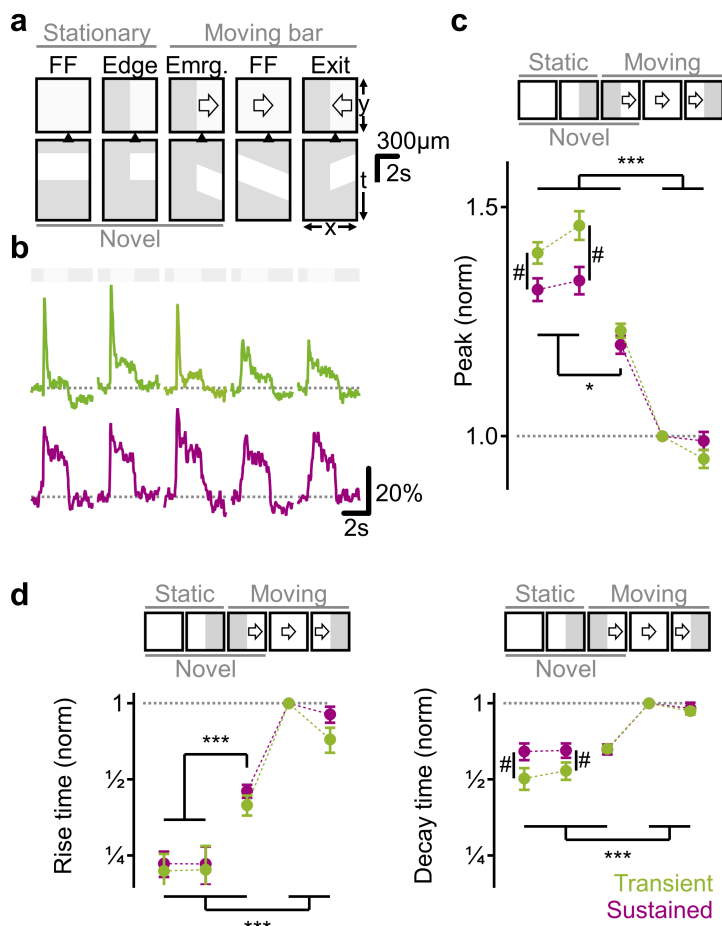

540 **Fig. 2. BCs release signals novel object appearance.** **a** Visual protocols. For each: spatial arrangement (left) of the mask (grey)/stimulus (white) and time-space plot (right). Triangle-horizonal RF position. **b** Responses from ROIs (green, transient; red, sustained) located up to 50  $\mu$ m from the mask-stimulus boundary. **c-d** Peak glutamate fluorescence (**c**), and rise and decay times (**d**) normalized by full-field motion. \* $p < 0.05$ , \*\*\* $p < 0.001$  for both kinetics; # $p < 0.001$  transient vs. sustained. Error bars-SEM.

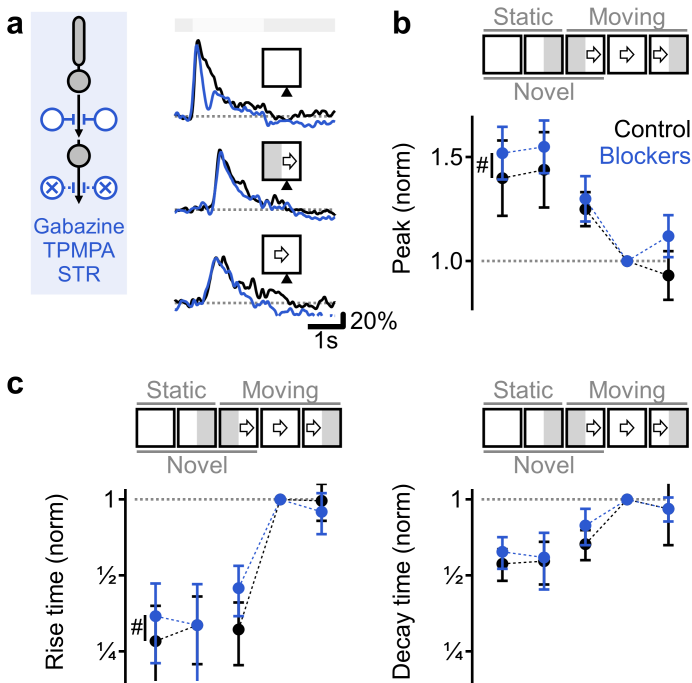

545 **Fig. 3. Pharmacological blockage of amacrine cell inhibition does not eliminate novel object sensitivity and slower motion response kinetics.** **a** Representative glutamate responses before (black) and after (blue) blockage of amacrine cell inhibition. **b-c** Peak glutamate fluorescence (**b**), and rise and decay times (**c**) normalized by full-field motion. # $p < 0.001$  control vs. blockers. ANOVA followed by Tukey test with Bonferroni's correction. Error bars-SEM.



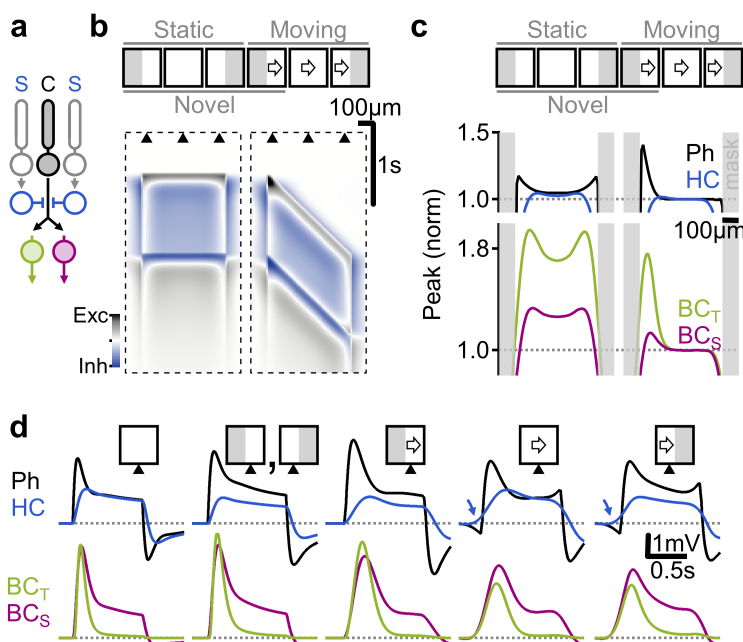

550 **Fig. 4. Detailed simulation of the first retinal synapse captures empirically observed novel**  
**object enhancement and population dynamics. a** The circuit modelled in **b-d**. **b** Space-time  
 plot showing the difference between photoreceptive and horizontal cell potentials. **c** Peak  
 depolarization vs. spatial positions; the kinetics of the BCs (bottom) differ due to simulated BC  
 sensitivity to photoreceptive release. Photoreceptive and horizontal cell voltages are inverted.  
 555 **d** Responses from cells in positions marked in **b**. Arrows, preceding inhibition.

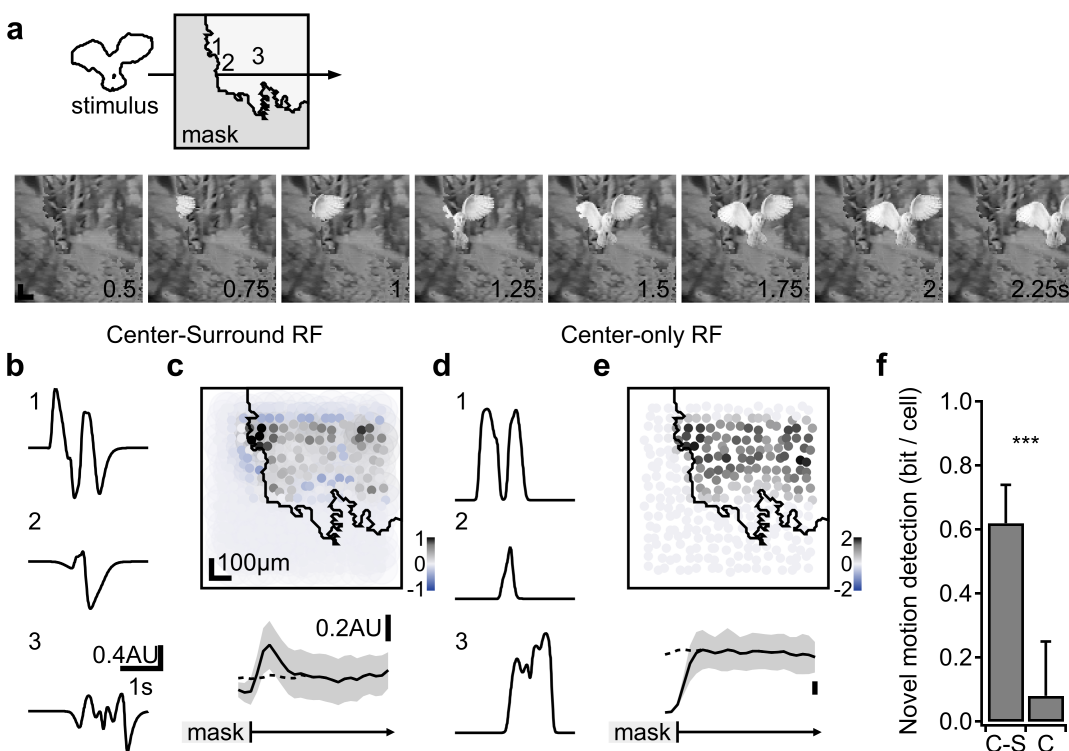

**Fig. 5. Novel object detection by linear center-surround RFs under natural movies.** Simulated neuronal responses to a movie showing predator appearance (a). **b** Temporal response profile of three sample cells with a linear center-surround RF formulation at the spatial coordinates shown in (a). **c** Top, the peak response amplitude to stimulus motion from a population of simulated neurons. Activation is maximal near stimulus emergence. Bottom, the mean ( $\pm$ SD) change in RF activation vs. distance from the mask ( $n=1000$  permutations of the background, the horizontal scale is preserved for both plots). Dashed trace, responses in the absence of the mask. **d-e** As in (b-c), with the surround component removed from the RF description. **f** The mean( $\pm$ SD) mutual information computed from the differences in responses of individual neurons located near ( $<100 \mu\text{m}$ ) the location of stimulus emergence to simulations in the presence or the absence of the mask. \*\*\* $p<0.001$  between the two RF architectures (t-test).

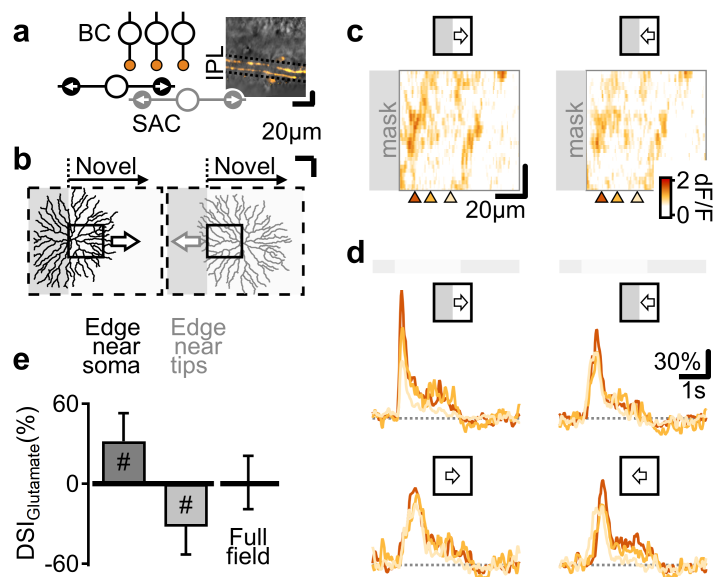

570

**Fig. 6. Sensitivity to novel objects in BCs influences the analysis of motion processing in postsynaptic circuits.** **a** Starburst amacrine cells (SACs) integrate BC signals to detect motion towards dendritic tips. Inset, floxed-iGluSnFR expression (orange) in a Chat-Cre mouse. **b** Illustration of novel emergence enhancement vs. dendritic direction preference (arrows) in two example SACs (reconstructed in a separate experiment). Solid rectangle, the imaging window. **c-d** Example peak fluorescence (**c**) and signals in ROIs (**d**, horizontal location marked in **c**) evoked by moving bars. **e** The mean ( $\pm$ SD) directional preference from the perspective of the SACs in **b**. # $p < 0.001$  vs. zero.

580

## References

- 1 Zhang, Y., Kim, I. J., Sanes, J. R. & Meister, M. The most numerous ganglion cell type of the  
585 mouse retina is a selective feature detector. *Proceedings of the National Academy of Sciences of the United States of America* **109**, E2391-2398, doi:10.1073/pnas.1211547109 (2012).
- 2 Olveczky, B. P., Baccus, S. A. & Meister, M. Segregation of object and background motion in the  
retina. *Nature* **423**, 401-408, doi:10.1038/nature01652 (2003).
- 3 Manookin, M. B., Patterson, S. S. & Linehan, C. M. Neural Mechanisms Mediating Motion  
590 Sensitivity in Parasol Ganglion Cells of the Primate Retina. *Neuron*,  
doi:10.1016/j.neuron.2018.02.006 (2018).
- 4 Munch, T. A. *et al.* Approach sensitivity in the retina processed by a multifunctional neural  
circuit. *Nature neuroscience* **12**, 1308-1316, doi:10.1038/nn.2389 (2009).
- 5 Schwartz, G., Taylor, S., Fisher, C., Harris, R. & Berry, M. J., 2nd. Synchronized firing among  
595 retinal ganglion cells signals motion reversal. *Neuron* **55**, 958-969,  
doi:10.1016/j.neuron.2007.07.042 (2007).
- 6 Mauss, A. S., Vlasits, A., Borst, A. & Feller, M. Visual Circuits for Direction Selectivity. *Annu Rev  
Neurosci*, doi:10.1146/annurev-neuro-072116-031335 (2017).
- 7 Wei, W. Neural Mechanisms of Motion Processing in the Mammalian Retina. *Annu Rev Vis Sci* **4**,  
600 165-192, doi:10.1146/annurev-vision-091517-034048 (2018).
- 8 Euler, T., Haverkamp, S., Schubert, T. & Baden, T. Retinal bipolar cells: elementary building  
blocks of vision. *Nature reviews* **15**, 507-519, doi:10.1038/nrn3783 (2014).
- 9 Franke, K. *et al.* Inhibition decorrelates visual feature representations in the inner retina. *Nature*  
**542**, 439-444, doi:10.1038/nature21394 (2017).
- 605 10 Behrens, C., Schubert, T., Haverkamp, S., Euler, T. & Berens, P. Connectivity map of bipolar cells  
and photoreceptors in the mouse retina. *eLife* **5**, doi:10.7554/eLife.20041 (2016).
- 11 Baden, T., Berens, P., Bethge, M. & Euler, T. Spikes in mammalian bipolar cells support temporal  
layering of the inner retina. *Current biology : CB* **23**, 48-52, doi:10.1016/j.cub.2012.11.006  
(2013).
- 610 12 Baden, T., Euler, T. & Berens, P. Understanding the retinal basis of vision across species. *Nature  
reviews*, doi:10.1038/s41583-019-0242-1 (2019).
- 13 Borghuis, B. G., Marvin, J. S., Looger, L. L. & Demb, J. B. Two-photon imaging of nonlinear  
glutamate release dynamics at bipolar cell synapses in the mouse retina. *The Journal of  
neuroscience : the official journal of the Society for Neuroscience* **33**, 10972-10985,  
615 doi:10.1523/JNEUROSCI.1241-13.2013 (2013).
- 14 Baccus, S. A., Olveczky, B. P., Manu, M. & Meister, M. A retinal circuit that computes object  
motion. *J Neurosci* **28**, 6807-6817 (2008).
- 15 Schwartz, G. W. *et al.* The spatial structure of a nonlinear receptive field. *Nature neuroscience*  
**15**, 1572-1580, doi:10.1038/nn.3225 (2012).
- 620 16 Thoreson, W. B. & Mangel, S. C. Lateral interactions in the outer retina. *Progress in retinal and  
eye research* **31**, 407-441, doi:10.1016/j.preteyeres.2012.04.003 (2012).
- 17 Kim, J. S. *et al.* Space-time wiring specificity supports direction selectivity in the retina. *Nature*  
**509**, 331-336, doi:10.1038/nature13240 (2014).
- 18 Fransen, J. W. & Borghuis, B. G. Temporally Diverse Excitation Generates Direction-Selective  
625 Responses in ON- and OFF-Type Retinal Starburst Amacrine Cells. *Cell reports* **18**, 1356-1365,  
doi:10.1016/j.celrep.2017.01.026 (2017).
- 19 Turner, M. H., Schwartz, G. W. & Rieke, F. Receptive field center-surround interactions mediate  
context-dependent spatial contrast encoding in the retina. *eLife* **7**, doi:10.7554/eLife.38841  
(2018).

- 630 20 Kuo, S. P., Schwartz, G. W. & Rieke, F. Nonlinear Spatiotemporal Integration by Electrical and  
Chemical Synapses in the Retina. *Neuron* **90**, 320-332, doi:10.1016/j.neuron.2016.03.012 (2016).
- 21 Pitkow, X. & Meister, M. Decorrelation and efficient coding by retinal ganglion cells. *Nature*  
*neuroscience* **15**, 628-635, doi:10.1038/nn.3064 (2012).
- 22 Schreyer, H. M. & Gollisch, T. Nonlinear spatial integration in retinal bipolar cells shapes the  
635 encoding of artificial and natural stimuli. *Neuron*, doi:10.1016/j.neuron.2021.03.015 (2021).
- 23 Marvin, J. S. *et al.* An optimized fluorescent probe for visualizing glutamate neurotransmission.  
*Nat Methods* **10**, 162-170, doi:10.1038/nmeth.2333 (2013).
- 24 Matsumoto, A., Briggman, K. L. & Yonehara, K. Spatiotemporally Asymmetric Excitation Supports  
Mammalian Retinal Motion Sensitivity. *Curr Biol*, doi:10.1016/j.cub.2019.08.048 (2019).
- 640 25 Hartline, H. K., Wagner, H. G. & Ratliff, F. Inhibition in the eye of Limulus. *The Journal of general*  
*physiology* **39**, 651-673, doi:10.1085/jgp.39.5.651 (1956).
- 26 Marr, D. & Hildreth, E. Theory of edge detection. *Proceedings of the Royal Society of London.*  
*Series B, Containing papers of a Biological character* **207**, 187-217, doi:10.1098/rspb.1980.0020  
(1980).
- 645 27 Grove, J. C. R. *et al.* Novel hybrid action of GABA mediates inhibitory feedback in the mammalian  
retina. *PLoS biology* **17**, e3000200, doi:10.1371/journal.pbio.3000200 (2019).
- 28 Barnes, S., Grove, J. C. R., McHugh, C. F., Hirano, A. A. & Brecha, N. C. Horizontal Cell Feedback  
to Cone Photoreceptors in Mammalian Retina: Novel Insights From the GABA-pH Hybrid Model.  
*Front Cell Neurosci* **14**, 595064, doi:10.3389/fncel.2020.595064 (2020).
- 650 29 Euler, T., Detwiler, P. B. & Denk, W. Directionally selective calcium signals in dendrites of  
starburst amacrine cells. *Nature* **418**, 845-852 (2002).
- 30 Ding, H., Smith, R. G., Poleg-Polsky, A., Diamond, J. S. & Briggman, K. L. Species-specific wiring  
for direction selectivity in the mammalian retina. *Nature* **535**, 105-110,  
doi:10.1038/nature18609 (2016).
- 655 31 Morrie, R. D. & Feller, M. B. A Dense Starburst Plexus Is Critical for Generating Direction  
Selectivity. *Curr Biol* **28**, 1204-1212 e1205, doi:10.1016/j.cub.2018.03.001 (2018).
- 32 Poleg-Polsky, A., Ding, H. & Diamond, J. S. Functional Compartmentalization within Starburst  
Amacrine Cell Dendrites in the Retina. *Cell reports* **22**, 2898-2908,  
doi:10.1016/j.celrep.2018.02.064 (2018).
- 660 33 Yonehara, K. *et al.* The first stage of cardinal direction selectivity is localized to the dendrites of  
retinal ganglion cells. *Neuron* **79**, 1078-1085, doi:10.1016/j.neuron.2013.08.005 (2013).
- 34 Gavrikov, K. E., Nilson, J. E., Dmitriev, A. V., Zucker, C. L. & Mangel, S. C. Dendritic  
compartmentalization of chloride cotransporters underlies directional responses of starburst  
amacrine cells in retina. *Proceedings of the National Academy of Sciences of the United States of*  
665 *America* **103**, 18793-18798, doi:0604551103 [pii]  
10.1073/pnas.0604551103 (2006).
- 35 Hausselet, S. E., Euler, T., Detwiler, P. B. & Denk, W. A dendrite-autonomous mechanism for  
direction selectivity in retinal starburst amacrine cells. *PLoS biology* **5**, e185 (2007).
- 36 Oesch, N. W. & Taylor, W. R. Tetrodotoxin-resistant sodium channels contribute to directional  
670 responses in starburst amacrine cells. *PLoS One* **5**, e12447, doi:10.1371/journal.pone.0012447  
(2010).
- 37 Koren, D., Grove, J. C. R. & Wei, W. Cross-compartmental Modulation of Dendritic Signals for  
Retinal Direction Selectivity. *Neuron* **95**, 914-927 e914, doi:10.1016/j.neuron.2017.07.020  
(2017).
- 675 38 Chen, Q., Pei, Z., Koren, D. & Wei, W. Stimulus-dependent recruitment of lateral inhibition  
underlies retinal direction selectivity. *eLife* **5**, doi:10.7554/eLife.21053 (2016).

- 39 Vlasits, A. L. *et al.* A Role for Synaptic Input Distribution in a Dendritic Computation of Motion  
Direction in the Retina. *Neuron* **89**, 1317-1330, doi:10.1016/j.neuron.2016.02.020 (2016).
- 680 40 Demb, J. B. Cellular mechanisms for direction selectivity in the retina. *Neuron* **55**, 179-186  
(2007).
- 41 Lee, S. & Zhou, Z. J. The synaptic mechanism of direction selectivity in distal processes of  
starburst amacrine cells. *Neuron* **51**, 787-799 (2006).
- 42 Dunn, F. A., Lankheet, M. J. & Rieke, F. Light adaptation in cone vision involves switching  
between receptor and post-receptor sites. *Nature* **449**, 603-606 (2007).
- 685 43 Clark, D. A., Benichou, R., Meister, M. & Azeredo da Silveira, R. Dynamical adaptation in  
photoreceptors. *PLoS Comput Biol* **9**, e1003289, doi:10.1371/journal.pcbi.1003289 (2013).
- 44 DeVries, S. H., Li, W. & Saszik, S. Parallel processing in two transmitter microenvironments at the  
cone photoreceptor synapse. *Neuron* **50**, 735-748, doi:10.1016/j.neuron.2006.04.034 (2006).
- 690 45 Olveczky, B. P., Baccus, S. A. & Meister, M. Retinal adaptation to object motion. *Neuron* **56**, 689-  
700 (2007).
- 46 Greene, M. J., Kim, J. S., Seung, H. S. & EyeWriters. Analogous Convergence of Sustained and  
Transient Inputs in Parallel On and Off Pathways for Retinal Motion Computation. *Cell reports*  
**14**, 1892-1900, doi:10.1016/j.celrep.2016.02.001 (2016).
- 695 47 Hassenstein, B., Reichardt, W. Systemtheoretische Analyse Der Zeit, Reihenfolgen Und  
Vorzeichenauswertung Bei Der Bewegungspereption Des Rüsselkäfers Chlorophanus. *Z.*  
*Naturforsch. B* **11**, 513-524 (1956).
- 48 Stincic, T., Smith, R. G. & Taylor, W. R. Time course of EPSCs in ON-type starburst amacrine cells  
is independent of dendritic location. *The Journal of physiology* **594**, 5685-5694,  
doi:10.1113/JP272384 (2016).
- 700 49 Abrams, R. A. & Christ, S. E. Motion onset captures attention. *Psychol Sci* **14**, 427-432,  
doi:10.1111/1467-9280.01458 (2003).
- 50 Smith, K. C. & Abrams, R. A. Motion onset really does capture attention. *Atten Percept*  
*Psychophys* **80**, 1775-1784, doi:10.3758/s13414-018-1548-1 (2018).
- 705 51 Vinje, W. E. & Gallant, J. L. Sparse coding and decorrelation in primary visual cortex during  
natural vision. *Science (New York, N.Y)* **287**, 1273-1276, doi:10.1126/science.287.5456.1273  
(2000).
- 52 Betsch, B. Y., Einhauser, W., Kording, K. P. & Konig, P. The world from a cat's perspective--  
statistics of natural videos. *Biological cybernetics* **90**, 41-50, doi:10.1007/s00422-003-0434-6  
(2004).

710
